# Supplementary material
Source: PubMed Central journal article supplement (PMC6645079)

# Synthesis and photophysical properties of $C_3$ -symmetric star-shaped molecules containing heterocycles such as furan, thiophene and oxazole

Sambasivarao Kotha,<sup>a,\*</sup> Saidulu Todeti,<sup>a</sup> M Bala Gopal,<sup>a</sup> Anindya Datta<sup>a</sup>

<sup>a</sup>Department of Chemistry, Indian Institute of Technology-Bombay, Mumbai-400076, India.

|                                                                      |       |
|----------------------------------------------------------------------|-------|
| <b>Figure S1</b> <sup>1</sup> H NMR spectrum of compound <b>2</b>    | SI-2  |
| <b>Figure S2</b> <sup>13</sup> C NMR spectrum of compound <b>2</b>   | SI-2  |
| <b>Figure S3</b> <sup>1</sup> H NMR spectrum of compound <b>11</b>   | SI-3  |
| <b>Figure S4</b> <sup>13</sup> C NMR spectrum of compound <b>11</b>  | SI-3  |
| <b>Figure S5</b> <sup>1</sup> H NMR spectrum of compound <b>12</b>   | SI-4  |
| <b>Figure S6</b> <sup>13</sup> C NMR spectrum of compound <b>12</b>  | SI-4  |
| <b>Figure S7</b> <sup>1</sup> H NMR spectrum of compound <b>6</b>    | SI-5  |
| <b>Figure S8</b> <sup>13</sup> C NMR spectrum of compound <b>6</b>   | SI-5  |
| <b>Figure S9</b> <sup>1</sup> H NMR spectrum of compound <b>14</b>   | SI-6  |
| <b>Figure S10</b> <sup>13</sup> C NMR spectrum of compound <b>14</b> | SI-6  |
| <b>Figure S11</b> <sup>1</sup> H NMR spectrum of compound <b>19</b>  | SI-7  |
| <b>Figure S12</b> <sup>13</sup> C NMR spectrum of compound <b>19</b> | SI-7  |
| <b>Figure S13</b> <sup>1</sup> H NMR spectrum of compound <b>20</b>  | SI-8  |
| <b>Figure S14</b> <sup>13</sup> C NMR spectrum of compound <b>20</b> | SI-8  |
| <b>Figure S15</b> <sup>1</sup> H NMR spectrum of compound <b>15</b>  | SI-9  |
| <b>Figure S16</b> <sup>13</sup> C NMR spectrum of compound <b>15</b> | SI-9  |
| <b>Figure S17</b> <sup>1</sup> H NMR spectrum of compound <b>18</b>  | SI-10 |
| <b>Figure S18</b> <sup>13</sup> C NMR spectrum of compound <b>18</b> | SI-10 |
| <b>Figure S19</b> <sup>1</sup> H NMR spectrum of compound <b>4</b>   | SI-11 |
| <b>Figure S20</b> <sup>13</sup> C NMR spectrum of compound <b>4</b>  | SI-11 |

Figure S1 <sup>1</sup>H NMR spectrum of compound 2

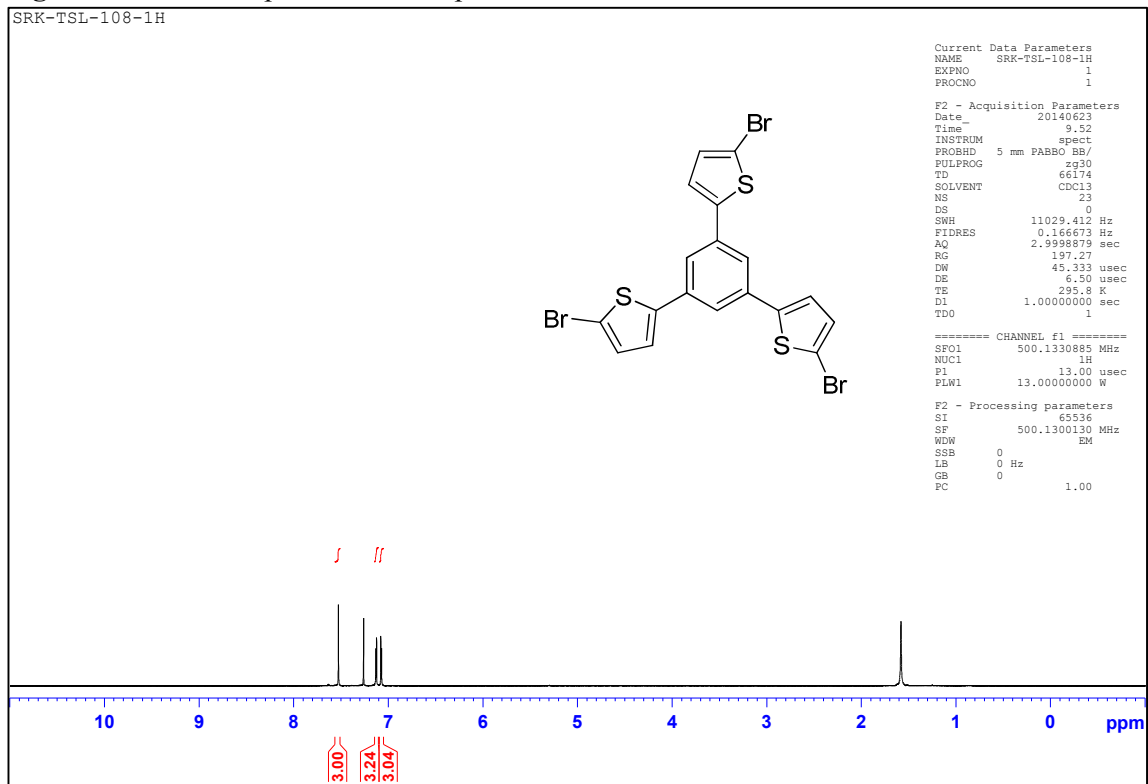

Figure S2 <sup>13</sup>C NMR spectrum of compound 2

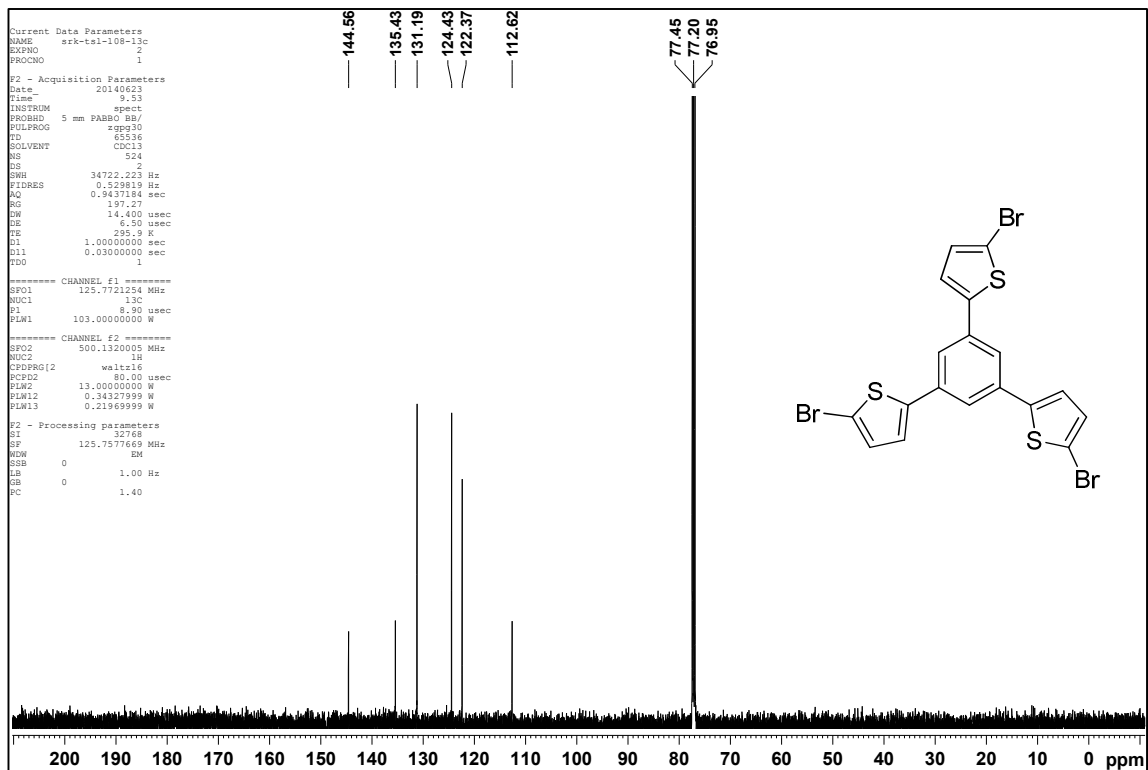

Figure S3 <sup>1</sup>H NMR spectrum of compound 11

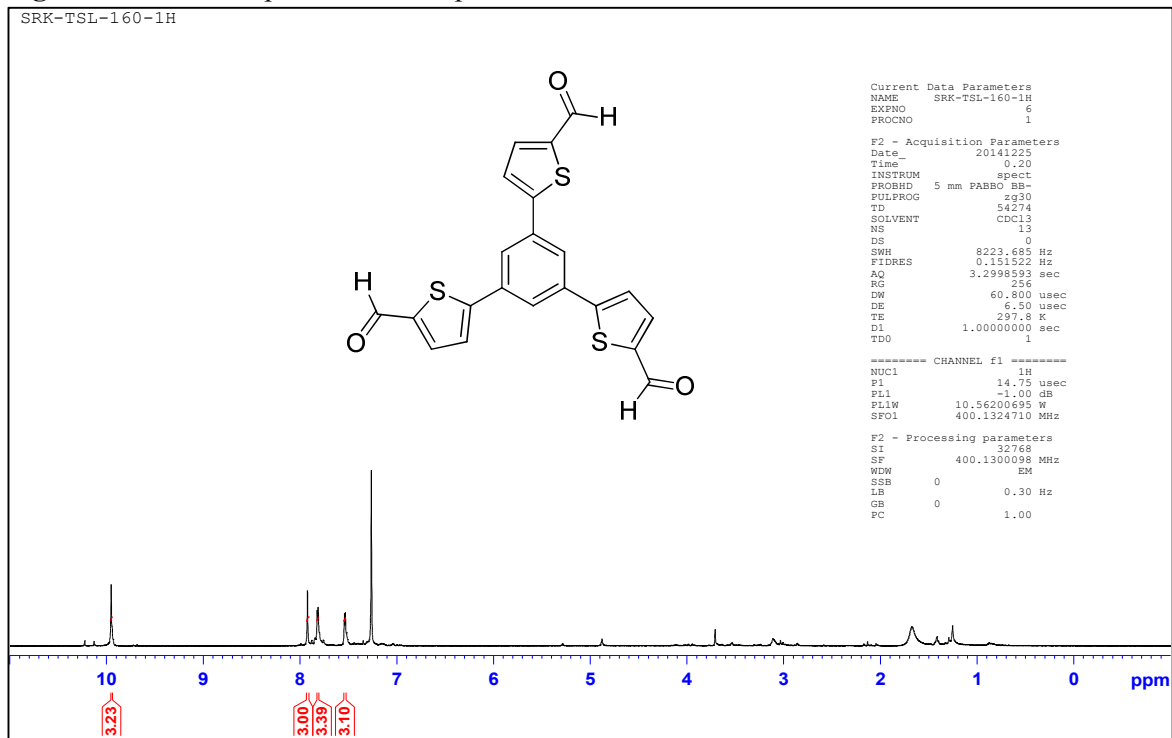

Figure S4 <sup>13</sup>C NMR spectrum of compound 11

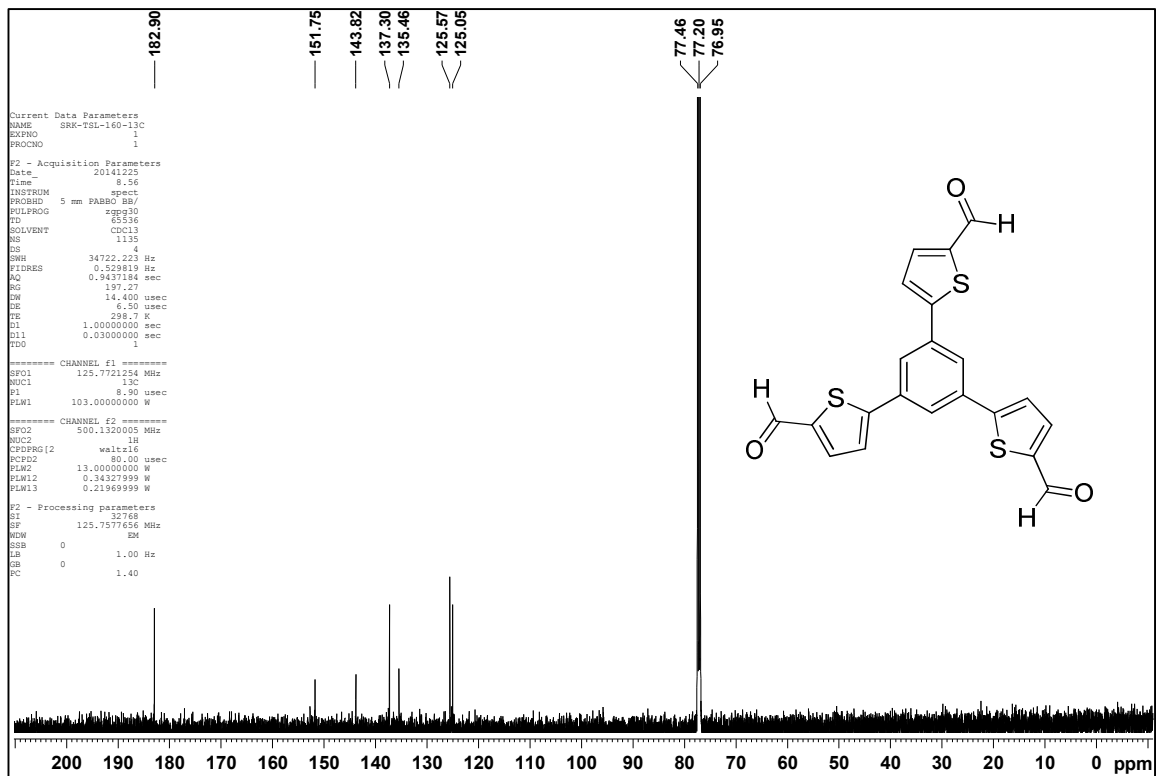

Figure S5 <sup>1</sup>H NMR spectrum of compound12

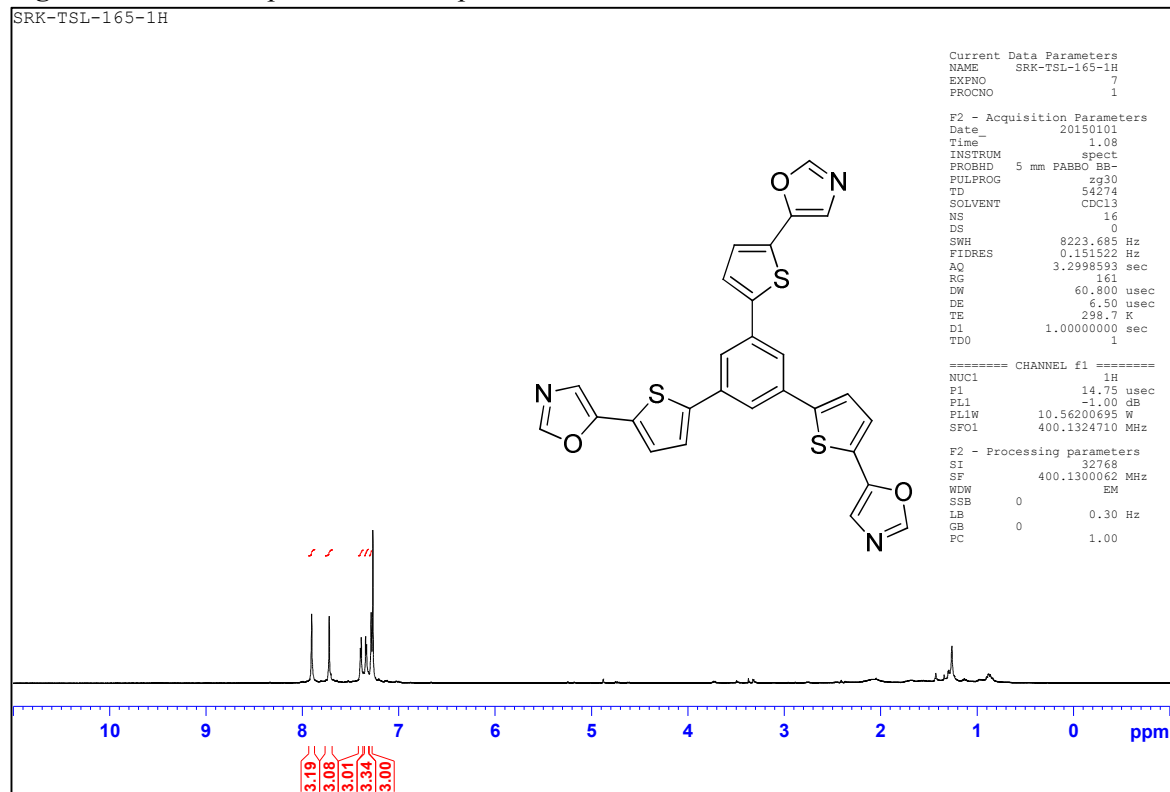

Figure S6 <sup>13</sup>C NMR spectrum of compound12

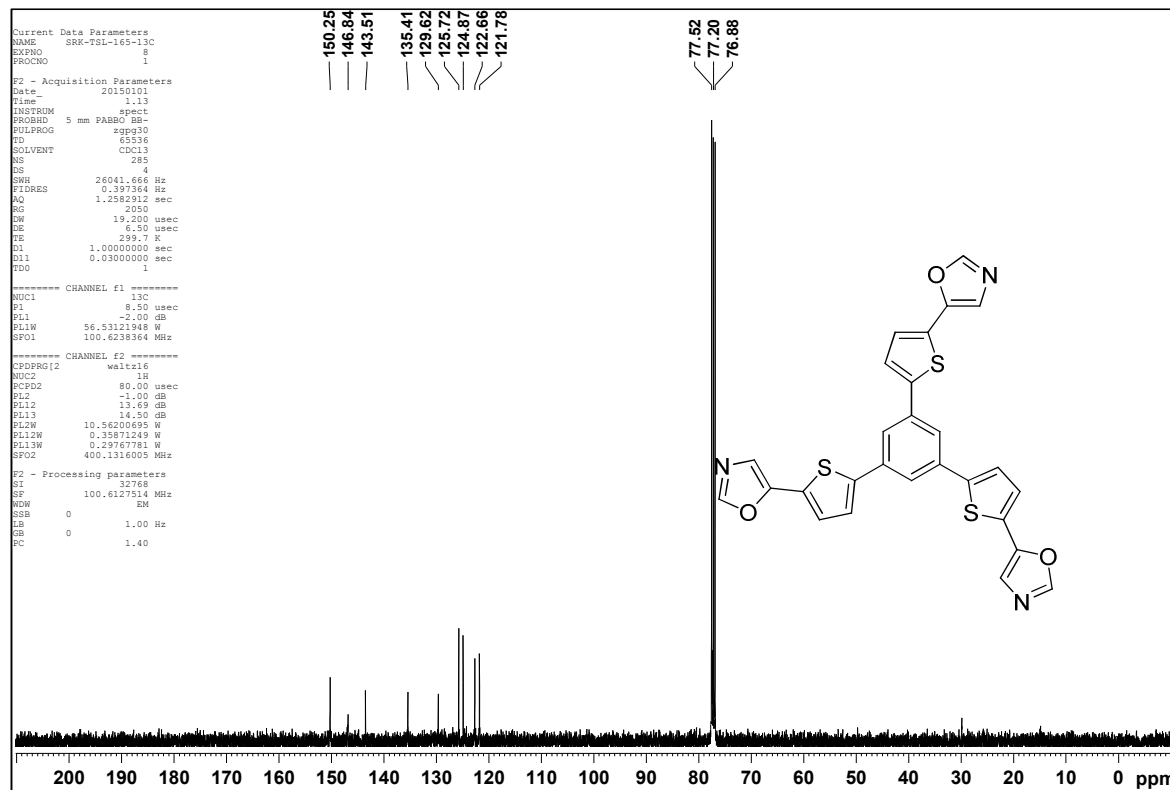

Figure S7 <sup>1</sup>H NMR spectrum of compound 6

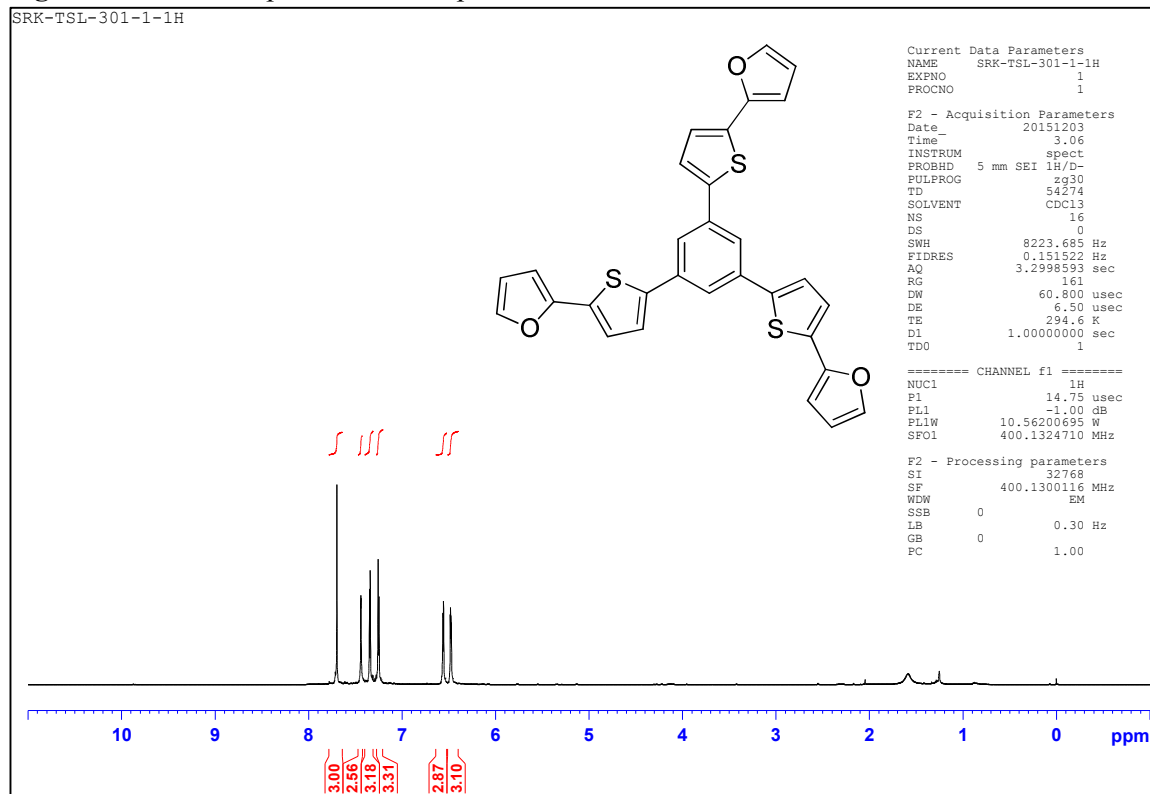

Figure S8 <sup>13</sup>C NMR spectrum of compound 6

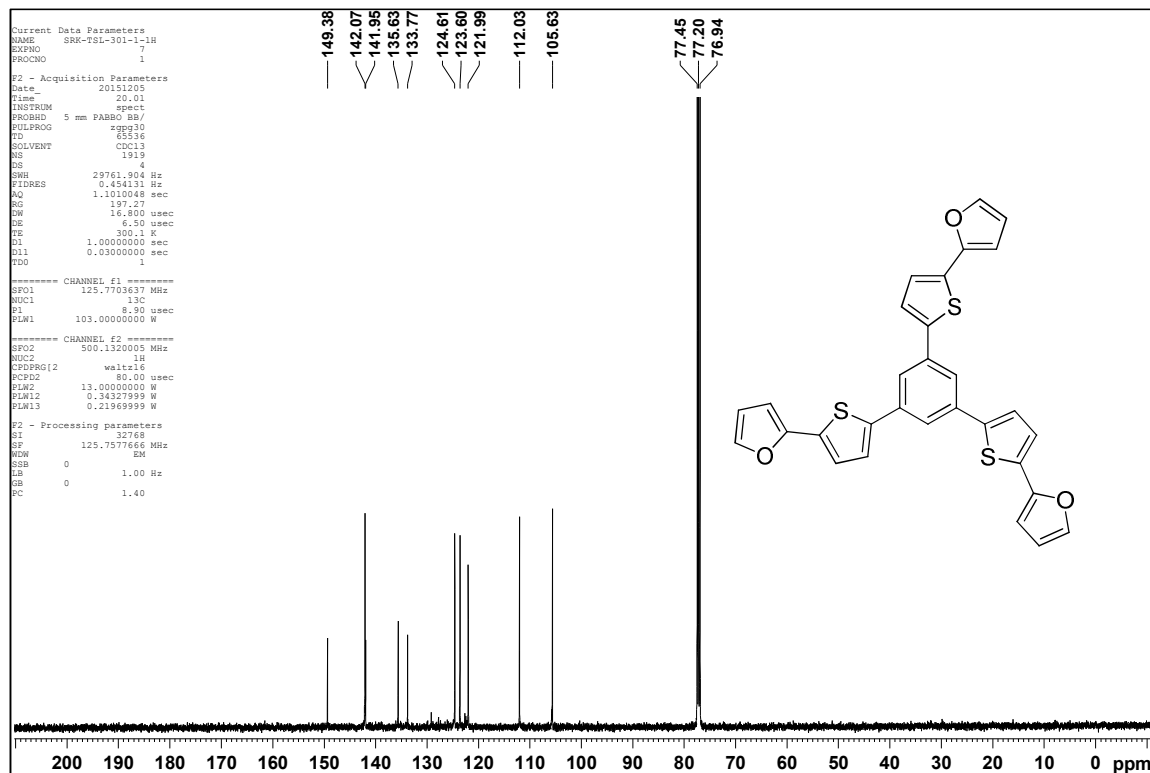

Figure S9 <sup>1</sup>H NMR spectrum of compound 14

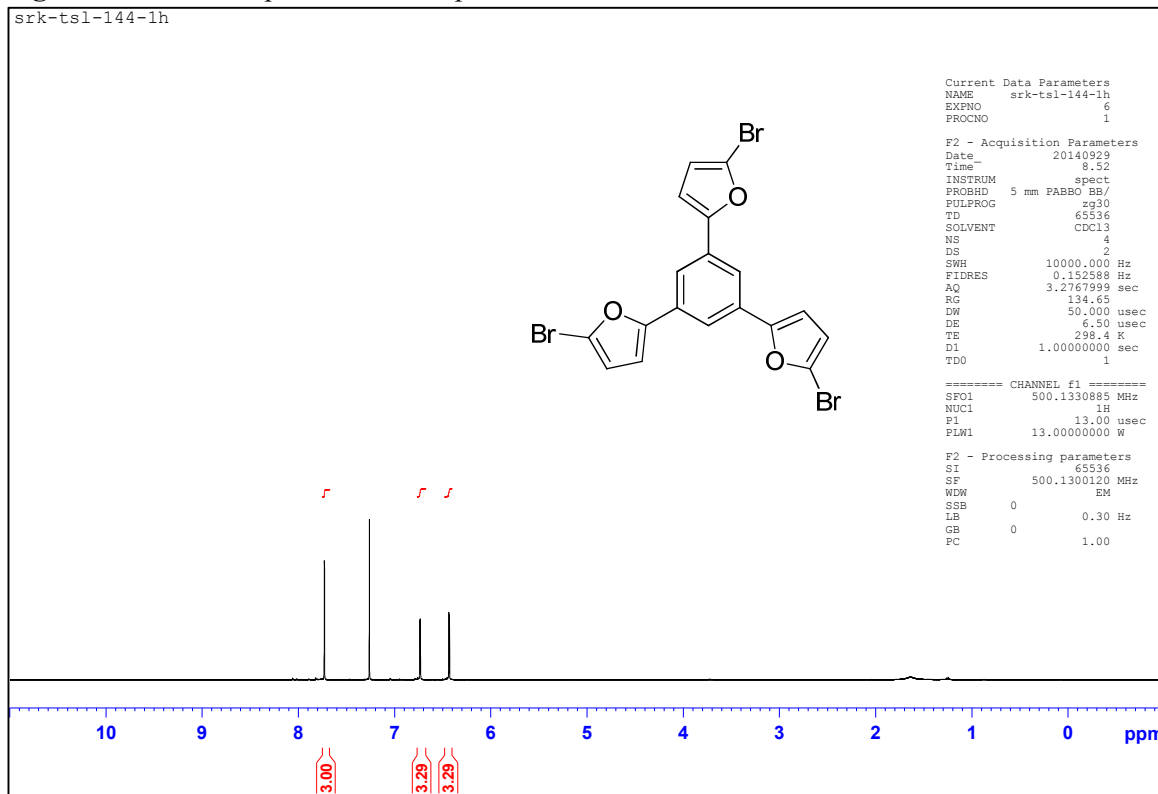

Figure S10 <sup>13</sup>C NMR spectrum of compound 14

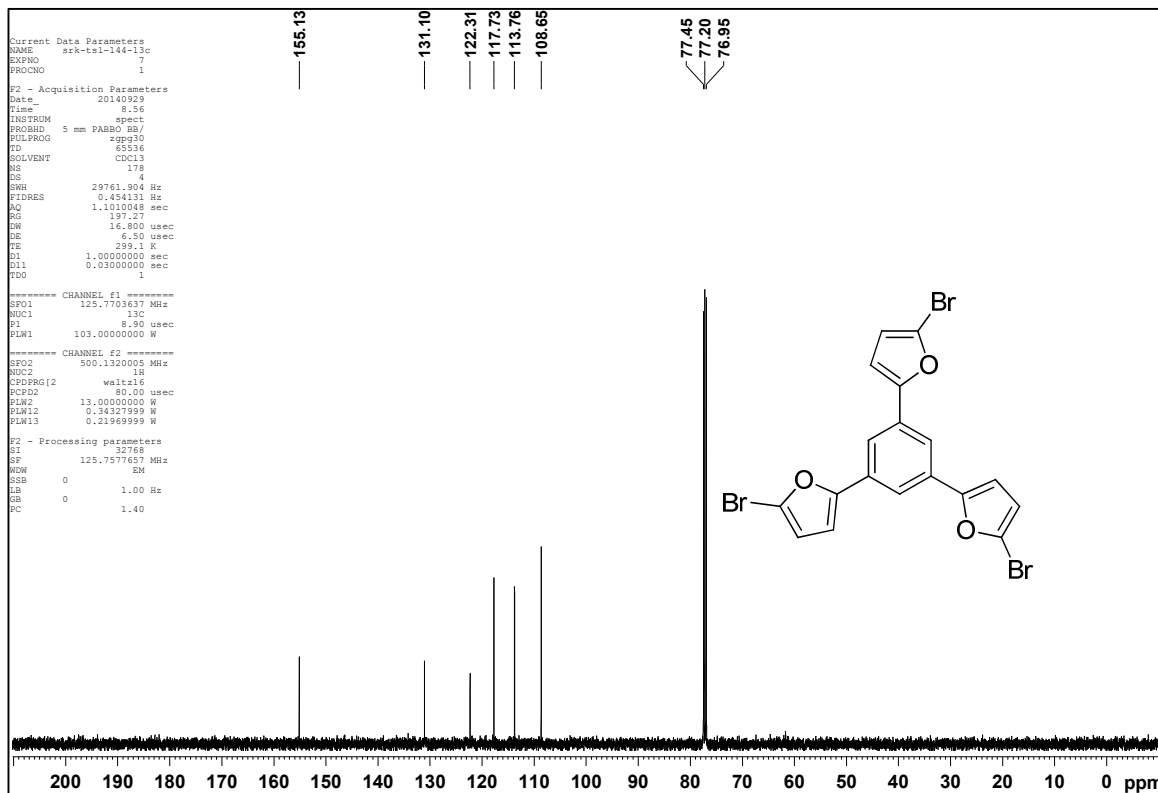

Figure S11 <sup>1</sup>H NMR spectrum of compound 19

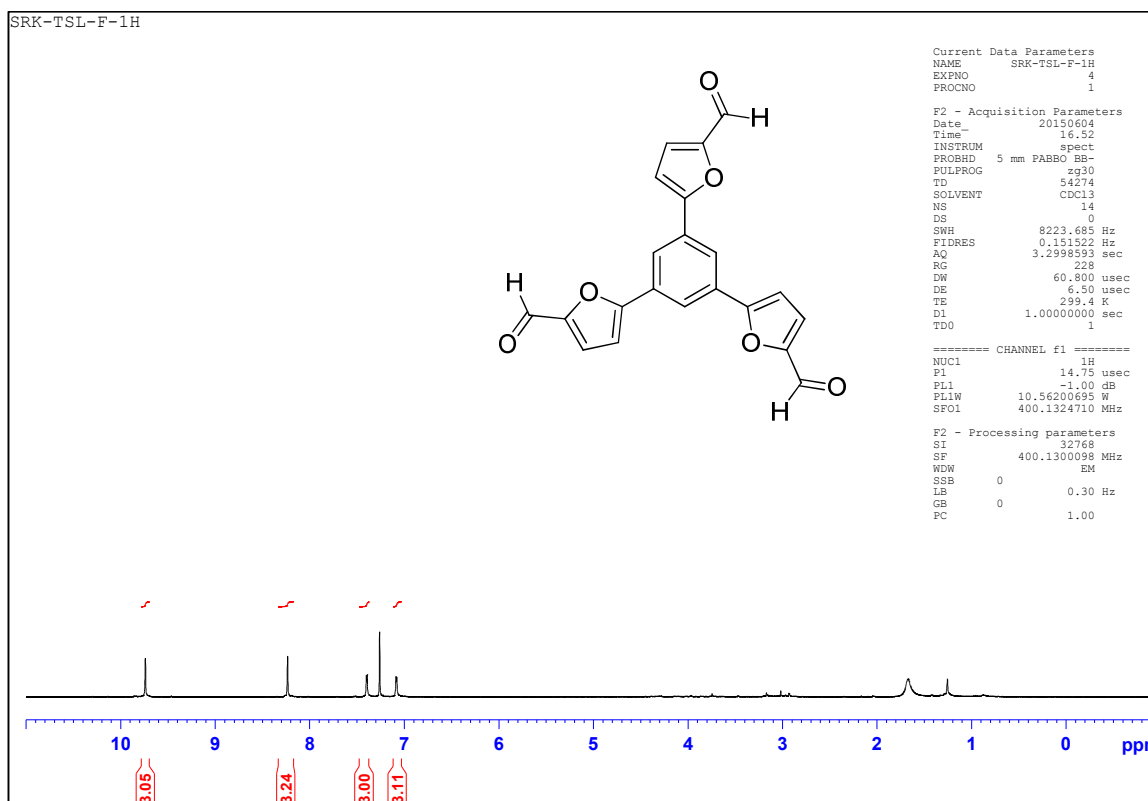

Figure S12 <sup>13</sup>C NMR spectrum of compound 19

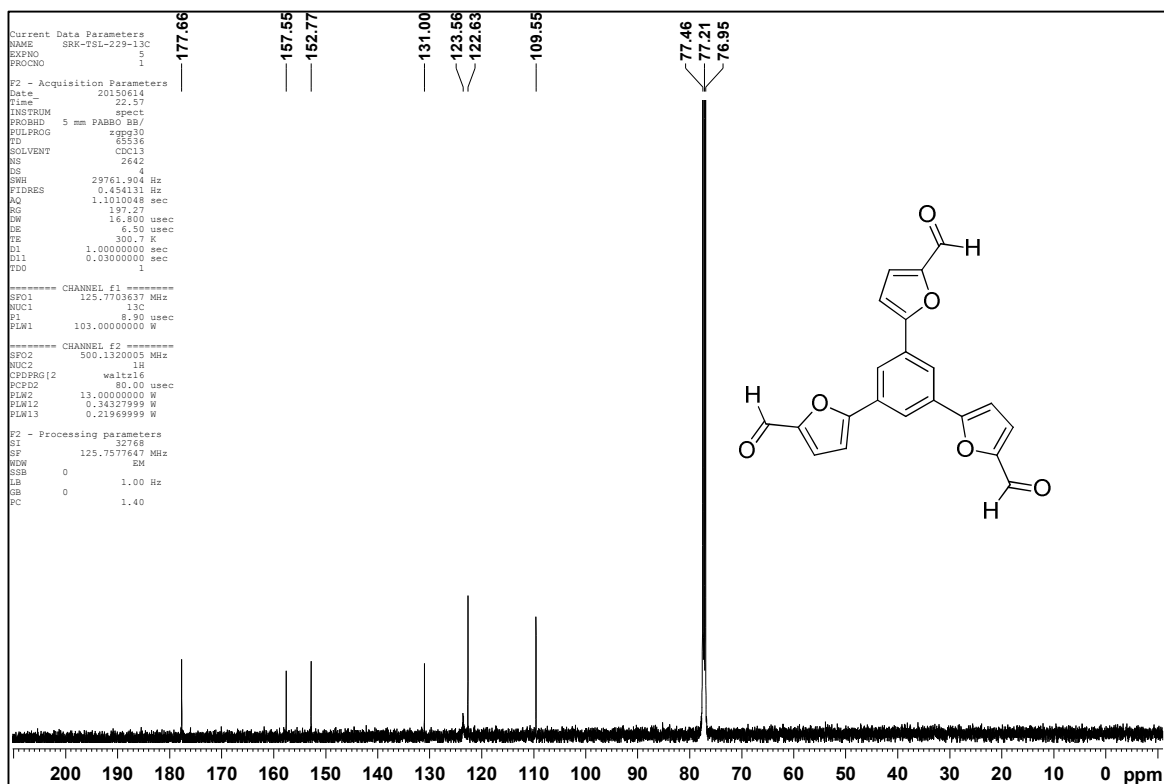

Figure S13 <sup>1</sup>H NMR spectrum of compound 20

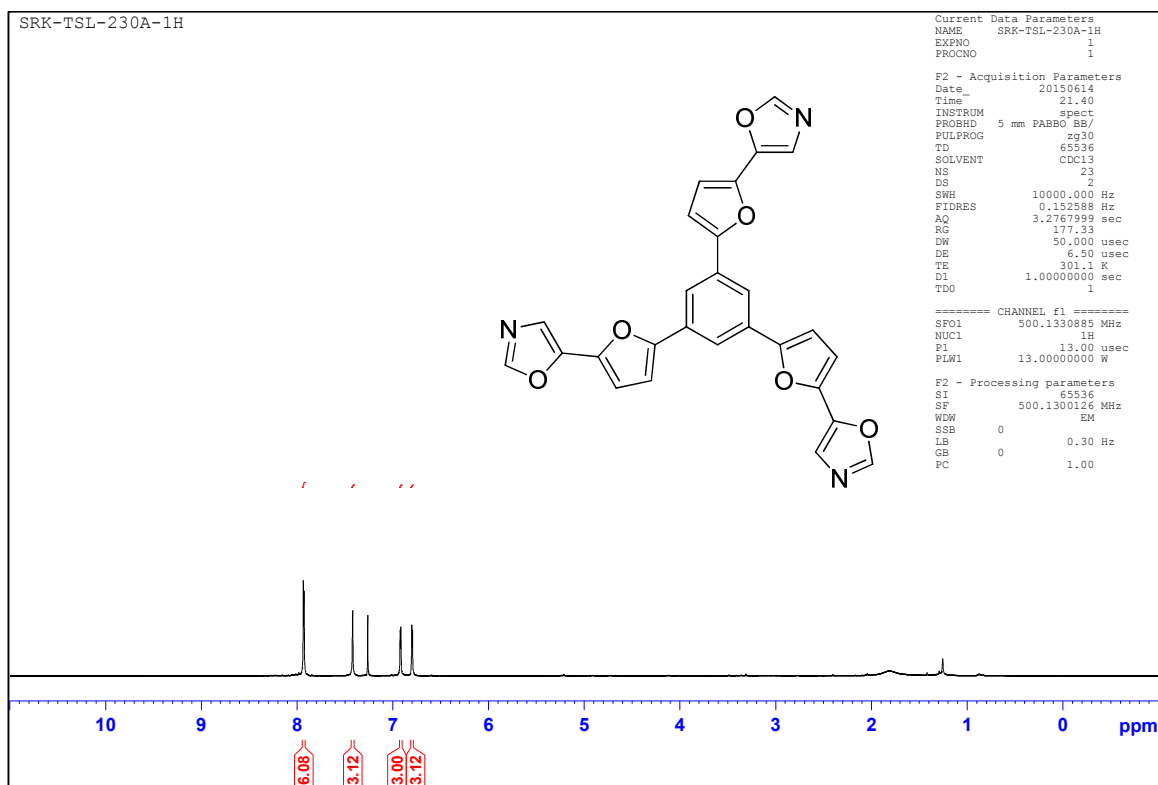

Figure S14 <sup>13</sup>C NMR spectrum of compound 20

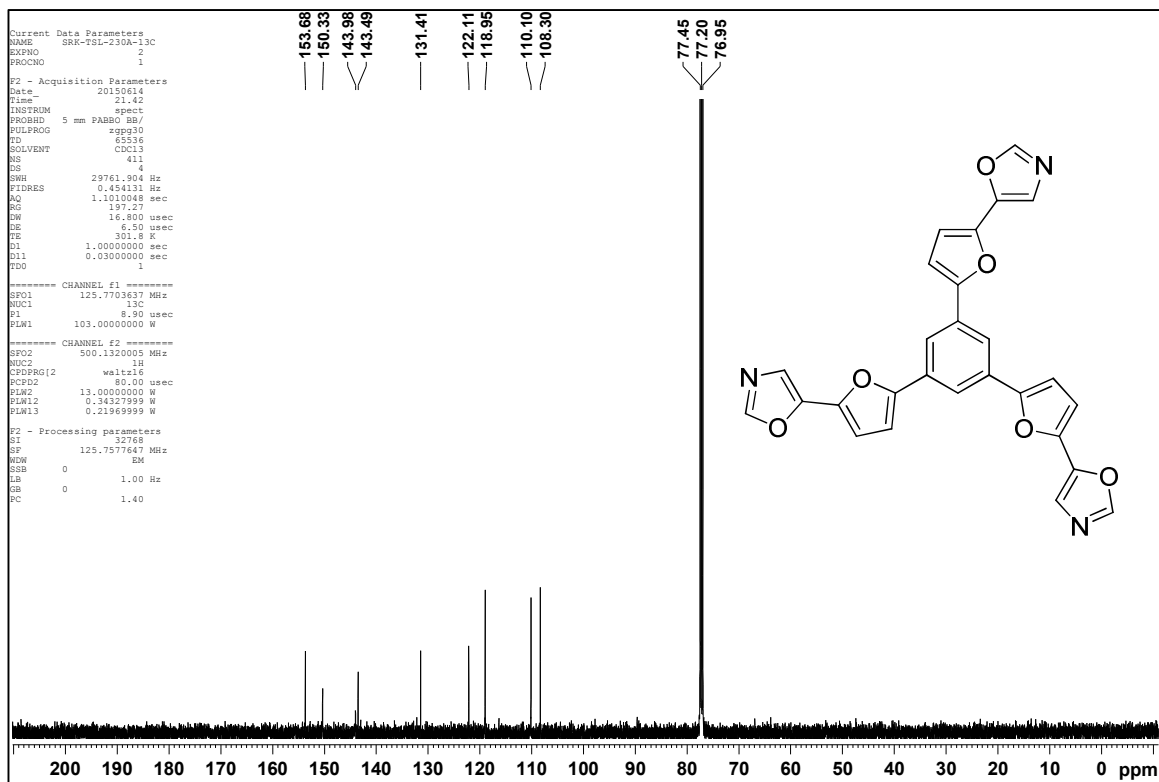



Figure S15 <sup>1</sup>H NMR spectrum of compound 15

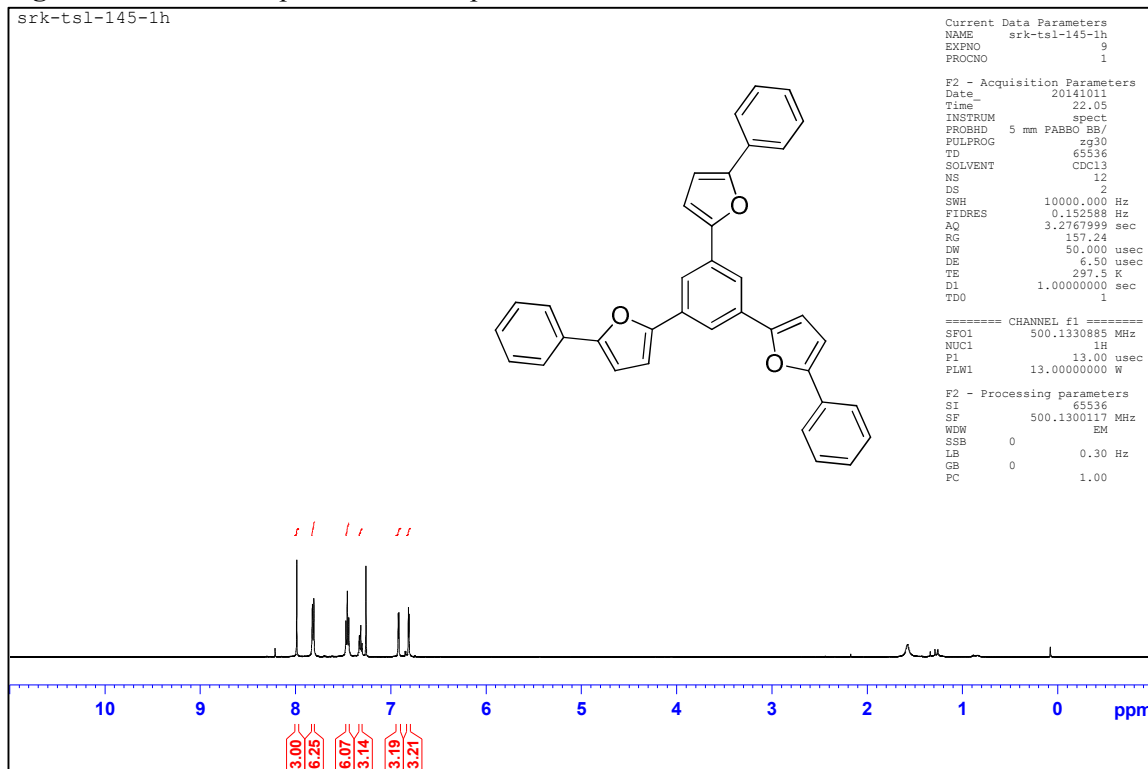

Figure S16 <sup>13</sup>C NMR spectrum of compound 15

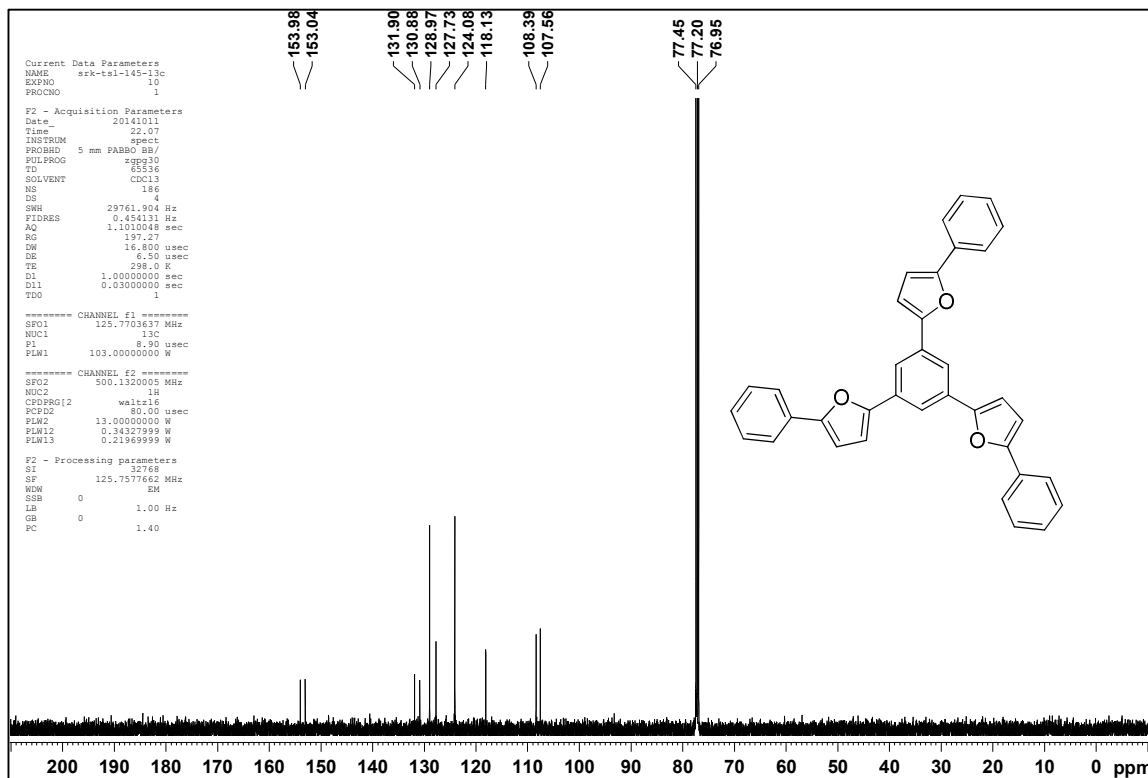

Figure S17 <sup>1</sup>H NMR spectrum of compound 18

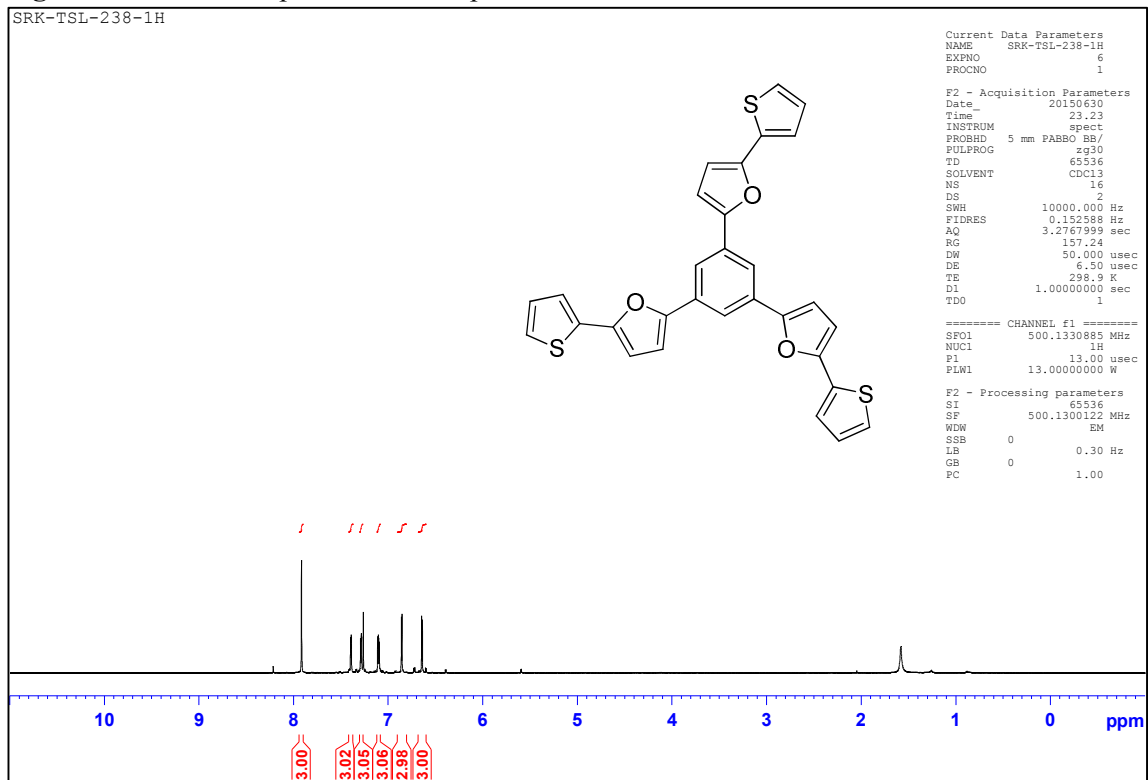

Figure S18 <sup>13</sup>C NMR spectrum of compound 18

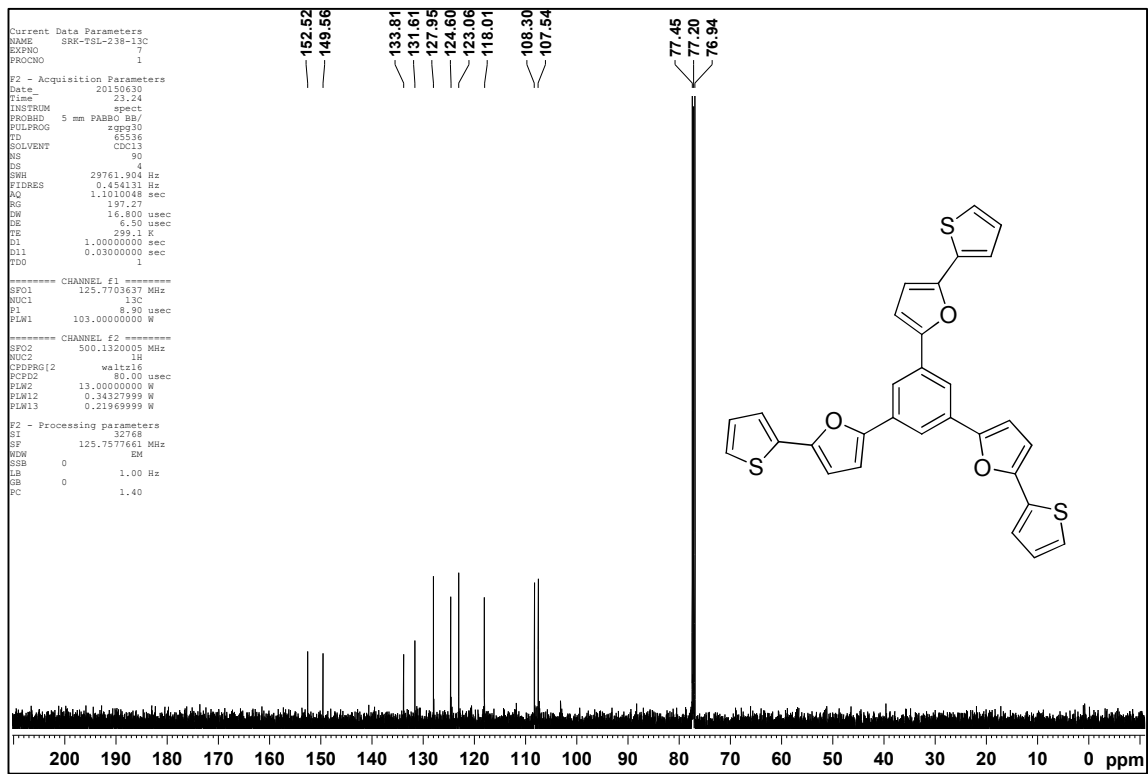

Figure S19 <sup>1</sup>H NMR spectrum of compound 4

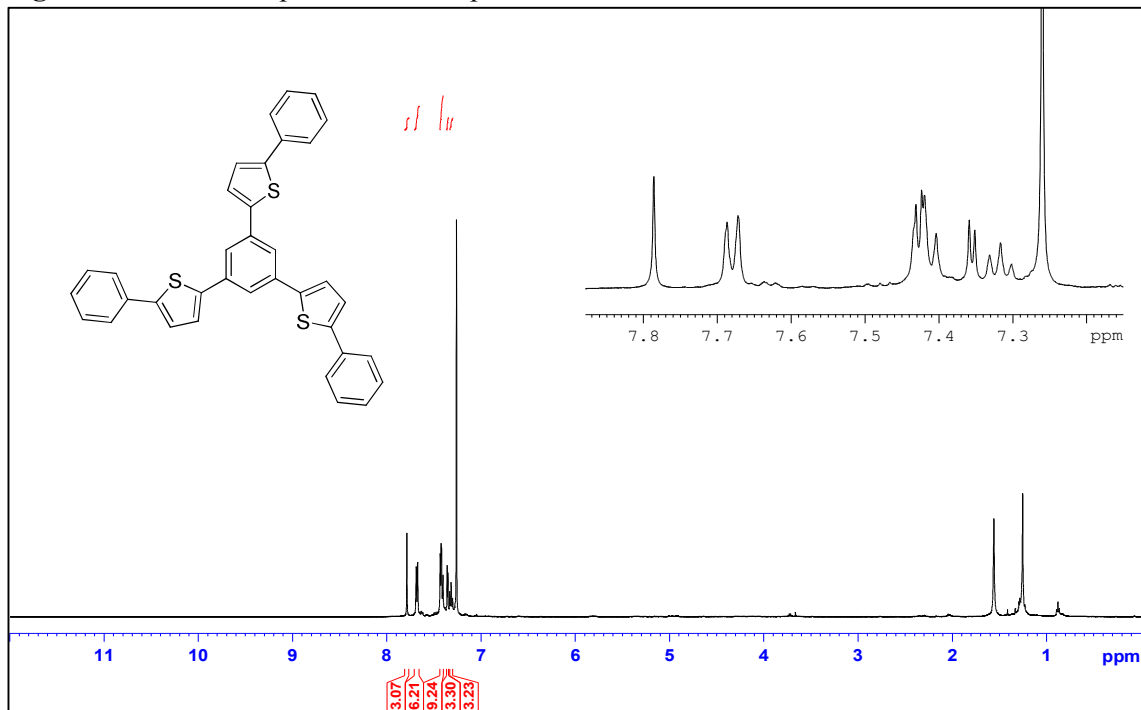

Figure S20 <sup>13</sup>C NMR spectrum of compound 4

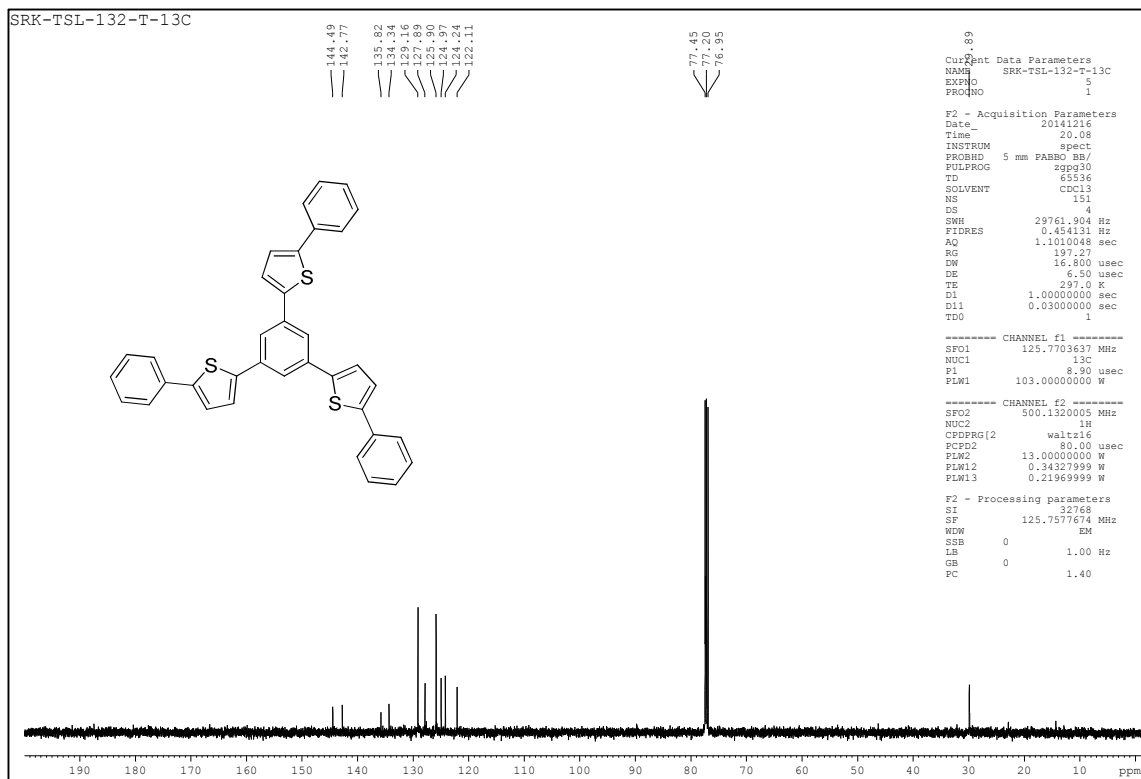

Supplement: ao7b00941_si_001.pdf [file ao7b00941_si_001.pdf]
